# Supplementary material for: An oxidorhenium(v) complex with an electron-withdrawing ligand: benefits and drawbacks for a dual role catalyst
Source: Royal Society of Chemistry journal article supplement (doi:10.1039/d4ra07391f), 2024-01-01
Supplement: d4ra07391f1.pdf [file d4ra07391f1.pdf]

Supporting information for

## An oxidorhenium(V) complex with an electron-withdrawing ligand: benefits and drawbacks for a dual role catalyst

A. Gradenegger,<sup>†</sup> J. A. Schachner,<sup>\*,†</sup> F. Belaj<sup>†</sup> and N. C. Mösch-Zanetti<sup>\*,†</sup>

<sup>†</sup>Institute of Chemistry, University of Graz, Schubertstraße 1, 8010 Graz.

**General.** For experiments under microwave heating in the synthesis of ligand **HL1**, an Anton Paar Monowave 300 (850 W magnetron) with magnetic stirring was employed. Standard borosilicate glass reaction containers (G10, with snap caps) were used.

### Synthesis of **HL1**.

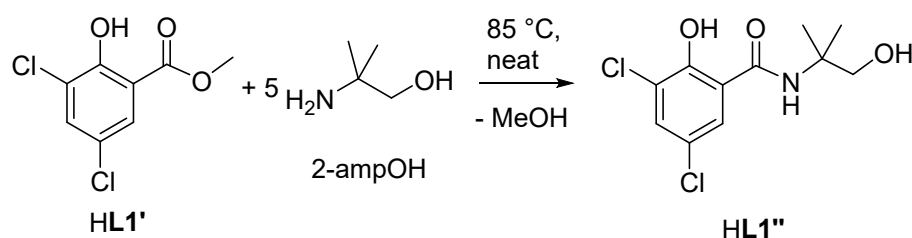

Scheme S1. Synthesis of ligand precursor **HL1''**. Synthesis of ligand precursor **HL1'** has been published.<sup>1</sup>

Synthesis of ligand precursor **HL1''**: 2.07 g (23.3 mmol, 5 equiv.) of 2-amino-2-methylpropanol (2-ampOH) was molten in a flask at 85 °C under stirring. Then **HL1'** (1.03 g, 4.66 mmol, 1 equiv.) was added slowly to the liquid amine. After 1h at 85 °C, the initial liquid reaction mixture had solidified and was cooled to room temperature. The mixture was dissolved in H<sub>2</sub>O and acidified with 2M HCl, upon which the product **HL1''** precipitated. Extraction in Et<sub>2</sub>O (3x 20 ml) yielded the pure product in quantitative yield as a white solid (1.29 g, 4.66 mmol, >95%). TLC (silica, EtOAc/cyclohexane 1/1) R<sub>f</sub> = 0.41; <sup>1</sup>H NMR (300 MHz, chloroform-d) δ 12.59 (s, 1H, Ar-OH), 7.46 (s, 1H), 7.29 (s, 1H), 6.59 (bs, 1H, NH), 3.70 (s, 2H, -CH<sub>2</sub>-), 1.44 (s, 6H, Me) (-CH<sub>2</sub>-OH not visible due to deuterium scrambling); ATR-IR (cm<sup>-1</sup>): 3480 (w), 3299 (w), 3076 (w), 3004 (w), 2979 (m), 2872 (m), 1643 (C=N, m), 1582 (m), 1551 (m), 1455 (m), 1344 (m), 1325 (m), 1253 (s), 1228 (s), 1198 (m), 1179(m), 1156(m), 1053 (m), 864(m), 739 (w), 653 (w), 478 (w), 419 (w); EI-MS (*m/z*): Only the M<sup>+</sup> peak for **HL1** is observed, due to ring closure under the experimental conditions for EI-MS (high vacuum, heating of sample).

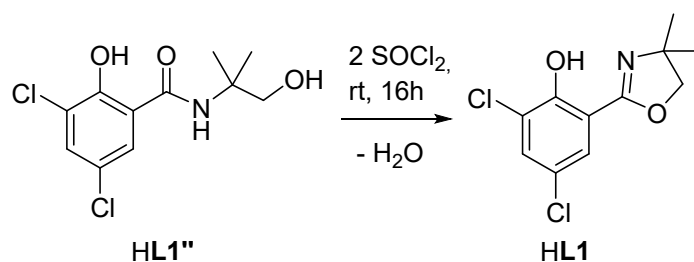

Scheme S2. Synthesis of ligand HL1.

Synthesis of ligand **HL1**: **HL1''** (4.72 g, 17.0 mmol, 1 equiv.) was suspended in 40 mL chloroform and thionyl chloride (2.5 mL, 34.1 mmol, 2 equiv.) was slowly added via syringe. After stirring overnight at rt the precipitated hydrochloride salt **HL1**·HCl was isolated by filtration and quenched with CH<sub>2</sub>Cl<sub>2</sub>/sat. NaHCO<sub>3</sub> to obtain **HL1** as an oily solid. Washing with cyclohexane gave an off-white solid (4.19 g, 16.1 mmol, >95%). TLC (silica, EtOAc/cyclohexane 1/1) R<sub>f</sub> = 0.58; <sup>1</sup>H NMR (300 MHz, chloroform-d) δ 11.26 (s, 1H), 7.54 (d, *J* = 2.6 Hz, 1H), 7.45 (d, *J* = 2.6 Hz, 1H), 4.15 (s, 2H), 1.41 (s, 6H); <sup>13</sup>C NMR (75 MHz, Chloroform-d) δ 162.67, 154.75, 133.06, 126.06, 123.19, 122.56 (6 phenol-C), 112.68 (-C(O)=N-), 79.08 (-CH<sub>2</sub>-), 67.53 (N-C(Me)<sub>2</sub>-), 28.54 (-CH<sub>3</sub>). ATR-IR (cm<sup>-1</sup>): 3322 (w), 3091 (w), 2968 (m), 2928 (m), 2850 (m), 1633 (C=N, m), 1574 (m), 1454 (m), 1433 (m), 1356 (m), 1326 (m), 1279 (s), 1252 (s), 1175 (m), 967 (m), 809 (m), 764 (w), 718 (w), 557 (w); EI-MS (*m/z*): 259.1 (M<sup>+</sup>).

**Attempts of ligand synthesis via microwave heating.** Each step of the above-described ligand syntheses was tested in addition with microwave heating with respect to a shortening of reaction times and steps. The thermal ring-closing without SOCl<sub>2</sub> has been published for other oxazoline ligands.<sup>2</sup> Hence, the direct synthesis of **HL1** from **HL1'** without the isolation of **HL1''** was of specific interest. However, it was found that yields and purities of the respective products were always lower by microwave heating, compared to conventional heating.

Table S1. Reaction conditions of microwave heating and yields for **HL1'**.

| entry | conditions <sup>a</sup> | yield <b>HL1'</b> [%] |
|-------|-------------------------|-----------------------|
| 1     | 100 °C, 10 min          | < 10                  |
| 2     | 150 °C, 10 min          | 37                    |
| 3     | 150 °C, 20 min          | 51                    |
| 4     | 150 °C, 40 min          | 57                    |
| 5     | 200 °C, 20 min          | decomposition         |
| 6     | 175 °C, 20 min          | 64                    |
| 7     | reflux, 12 h            | 92                    |

<sup>a</sup> 0.5 g HsalCl<sub>2</sub>, 32 μl H<sub>2</sub>SO<sub>4</sub>, 2.5 ml MeOH.

A summary of the results for the direct synthesis of **HL1** from methyl ester **HL1'** without the isolation of benzamide **HL1''** is shown in Table S2. The reaction mixture was tested by TLC for product distribution. Only where a single spot for ligand **HL1** was observed, the yield was determined.

Table S2. Reaction conditions of microwave heating and yields for **HL1**.

| entry | equiv. 2-ampOH | solvent | conditions <sup>a</sup>            | result                                    |
|-------|----------------|---------|------------------------------------|-------------------------------------------|
| 1     | 1              | neat    | 200 °C, 20 min                     | several spots on TLC                      |
| 2     | 1              | EtOH    | 100 °C, 20 min                     | <b>HL1'</b> and <b>HL1''</b>              |
| 3     | 1              | EtOH    | 150 °C, 20 min                     | <b>HL1'</b> and <b>HL1''</b>              |
| 4     | 1              | EtOH    | 170 °C, 20 min                     | <b>HL1'</b> , <b>HL1''</b> and <b>HL1</b> |
| 5     | 1              | EtOH    | 150 °C, 240min                     | <b>HL1'</b> , <b>HL1''</b> and <b>HL1</b> |
| 6     | 5              | neat    | 150 °C, 10 min                     | <b>HL1''</b> and <b>HL1</b>               |
| 7     | 5              | neat    | 150 °C, 20 min                     | <b>HL1''</b> and <b>HL1</b>               |
| 8     | 5              | neat    | 200 °C, 20 min                     | de-halogenation                           |
| 9     | 5              | neat    | 180 °C, 90 min                     | <b>HL1</b> , yield: 20%                   |
| 10    | 10             | neat    | 170 °C, 20 min                     | <b>HL1''</b> and <b>HL1</b>               |
| 11    | 10             | neat    | 180 °C, 20 min                     | <b>HL1''</b> and <b>HL1</b>               |
| 12    | 10             | neat    | 180 °C, 40 min                     | <b>HL1</b> , yield: 54%                   |
| 13    | 10             | neat    | 100 °C, 15 min →<br>200 °C, 15 min | de-halogenation                           |
| 14    | 10             | neat    | 80 °C, 45 min →<br>180 °C, 45 min  | yield after CC <sup>b</sup> : 64%         |

<sup>a</sup> 0.5 g **HL1'**, 2.5 ml EtOH (entries 2-5); <sup>b</sup> column chromatography.

As shown in Table S2, reaction temperatures of 200 °C led to decomposition of **HL1** (entries 1, 8 and 13). Judging from NMR data, a de-halogenation of the phenyl ring occurs at these temperatures, leading to the singly-chlorinated ligand. At temperatures of 180 °C, some product of **HL1** can be obtained (entries 9, 12 and 14). Considering that with our conventional synthesis high yields of **HL1** can be achieved without the need for column chromatography (CC), no further attempts for optimization by microwave heating were undertaken.

## Synthesis of complexes **3a**, **3b** and isolation of **3c**

When two equivalents of ligand **HL1** were heated to boiling with precursor **P1** in EtOH for four hours, only intractable mixtures of side-products were obtained under these conditions. This is in contrast to previously synthesized complexes  $[\text{ReOCl}(\text{dmozR})_2]$  ( $\text{R} = \text{H}, \text{OMe}, \text{NO}_2$ ).<sup>3</sup> When the reaction was attempted for four hours in boiling  $\text{CH}_3\text{CN}$ , a mixture of the two mono-ligated complexes  $[\text{ReOCl}_2(\text{SMe}_2)(\text{L1})]$  (*trans*-**3a**) and  $[\text{ReOCl}_2(\text{OPPh}_3)(\text{L1})]$  (**3b**) formed as the major products, but not the desired complex  $[\text{ReOCl}(\text{L1})_2]$  (**1**) (Scheme S3). Obviously, the reaction time of four hours does not allow for the second **L1** equivalent to coordinate to the Re center. Upon cooling to room temperature, **3a** precipitated first from the reaction mixture as a green micro-crystalline solid in low yield of 14%.  $^1\text{H}$  NMR spectra of **3a** only showed signals for one coordinated ligand moiety **L1**, together with the additional singlet peak for the  $\text{SMe}_2$  ligand (Figure S8). In accordance to the recorded NMR spectra, MS-spectrometry found the  $\text{M}^+$  peak at 594.9, further supporting the assignment of **3a** to be  $[\text{ReOCl}_2(\text{SMe}_2)(\text{L1})]$ . The molecular structure of *trans*-**3a** was finally confirmed by single-crystal X-ray diffraction analysis (Figure S20), with the two chlorido ligands in a *trans*-orientation. The loss of the  $\text{OPPh}_3$  instead of the  $\text{SMe}_2$  ligand of **P1** is rarely observed.<sup>4</sup>

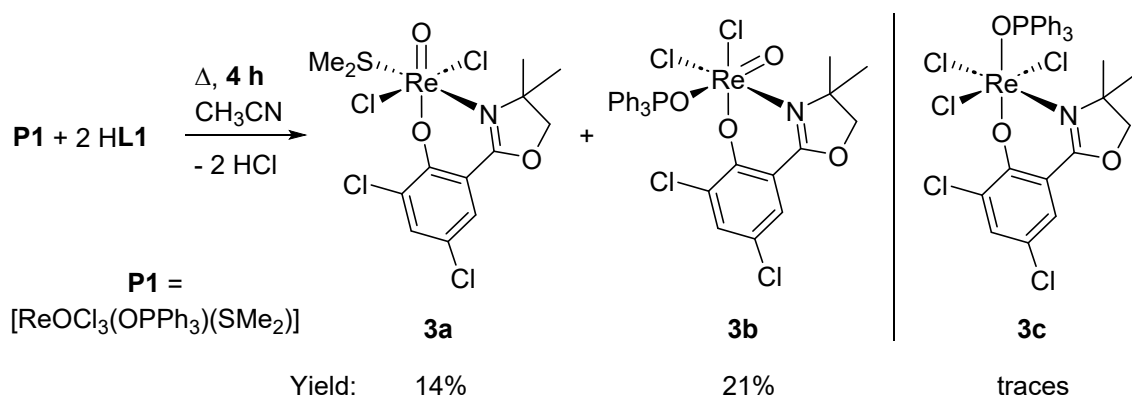

Scheme S3. Formation of oxidorhenium(V) complexes *trans*-**3a**, **3b** and rhenium(IV) complex **3c** under short reaction times (4 h).

Upon further concentration of the acetonitrile supernatant, mono-ligated complex  $[\text{ReOCl}_2(\text{OPPh}_3)(\text{L1})]$  (**3b**) precipitated, again as a green crystalline solid (yield 21%). Complex **3b** is mostly insoluble in  $\text{CDCl}_3$ , and just barely soluble enough in  $\text{CD}_3\text{CN}$  to obtain meaningful  $^1\text{H}$  NMR spectra. A coordinated  $\text{OPPh}_3$  ligand, appearing as the typical multiplet in the aromatic region, together with one coordinated **L1** moiety (Figure S10), indicated the composition of **3b** to be  $[\text{ReOCl}_2(\text{OPPh}_3)(\text{L1})]$ . In the  $^{31}\text{P}$  NMR spectrum, a peak at 27.11 ppm for **3b** could be assigned for the coordinated  $\text{OPPh}_3$  ligand (Figure S12). The growth of single crystals suitable for X-ray diffraction analysis confirmed the molecular structure to be  $[\text{ReOCl}_2(\text{OPPh}_3)(\text{L1})]$  (Figure S21). In literature, there are other examples for complexes of the

type  $[\text{ReOCl}_2(\text{OPPh}_3)(\text{LL})]$  ( $\text{LL} = \text{bidentate ligand}$ ),<sup>5</sup> and in a few cases by synthesis from **P1**.<sup>4,6</sup> The yields of *trans*-**3a** and **3b** are rather low (combined 35%). In an attempt to increase the yield of **3a/b**, a remaining supernatant acetonitrile solution was stored for several days in the freezer at  $-25\text{ }^\circ\text{C}$ . Instead of expected green crystals of **3a/b**, bright red crystals formed in very small amounts. The red crystals were suitable for X-ray diffraction analysis, revealing this complex to be the rhenium(IV) complex  $[\text{ReCl}_3(\text{OPPh}_3)(\text{L1})]$  (**3c**, Figure S22). As **3c** was never observed in crude reaction mixtures directly after synthesis of **3a/b**, we assume that **3c** is a decomposition product of **3a/b**. The reduction of oxidorhenium(V) complexes in the presence of oxidizable organic compounds, often P(III) ligands, has been observed before.<sup>7</sup> The formation of Re(IV)-OPPh<sub>3</sub> complexes in contrast is a rather rare occurrence.<sup>8</sup> As the initial goal was to synthesize complex  $[\text{ReOCl}(\text{L1})_2]$  (**1**), we did not further optimize the reaction conditions for a targeted synthesis of **3a** or **3b**.

### Comparison of selected bond lengths and angles for **1** and **2** with previously published oxidorhenium(V) and dioxidorhenium(VI) complexes

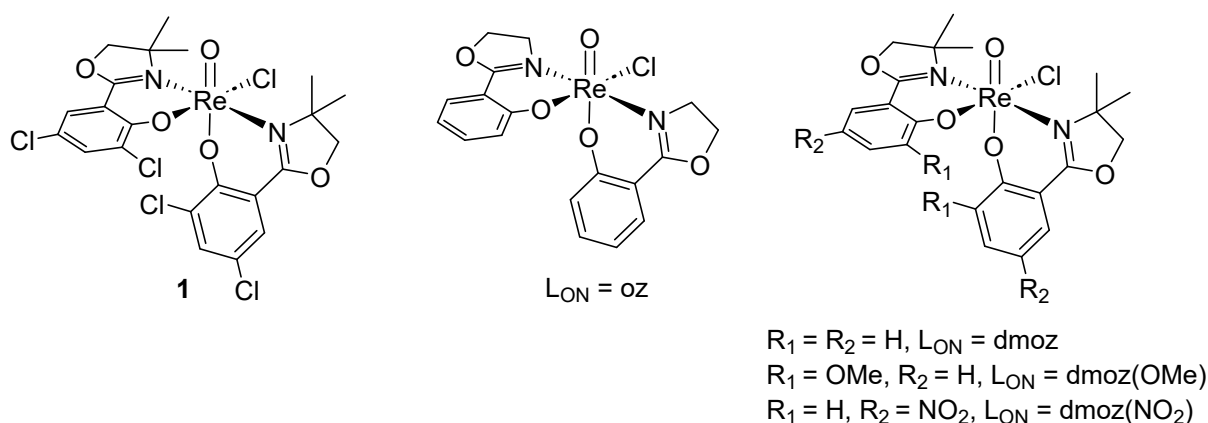

Figure S1. Oxidorhenium(V) complexes for structural comparison in Table S3

Table S3. Selected bond lengths [Å] of oxidorhenium(V) complex **1** with previously published oxidorhenium(V) complexes

| $\text{ReOCl}(\text{L}_{\text{ON}})_2$ | $\text{L}_{\text{ON}} = \text{L1}, \mathbf{1}$ | $\text{L}_{\text{ON}} = \text{oz}^9$ | $\text{L}_{\text{ON}} = \text{dmoz}^3$ | $\text{L}_{\text{ON}} = \text{dmoz}(\text{OMe})^3$ | $\text{L}_{\text{ON}} = \text{dmoz}(\text{NO}_2)^3$ |
|----------------------------------------|------------------------------------------------|--------------------------------------|----------------------------------------|----------------------------------------------------|-----------------------------------------------------|
| Re1=O1                                 | 1.700(5)                                       | 1.692(3)                             | 1.682(6)                               | 1.757(4)                                           | 1.719(4)                                            |
| Re-Cl1                                 | 2.3960(17)                                     | 2.4093(10)                           | 2.440(2)                               | 2.400(2)                                           | 2.4087(18)                                          |
| Re-O21                                 | 2.016(4)                                       | 2.001(3)                             | 2.056(7)                               | 1.987(4)                                           | 2.033(3)                                            |
| Re1-O41                                | 2.006(4)                                       | 2.007(3)                             | 1.994(7)                               | 1.999(4)                                           | 1.962(3)                                            |
| Re-N13                                 | 2.106(5)                                       | 2.112(2)                             | 2.203(5)                               | 2.118(5)                                           | 2.205(3)                                            |
| Re-N33                                 | 2.096(5)                                       | 2.064(3)                             | 2.058(5)                               | 2.096(4)                                           | 2.037(3)                                            |

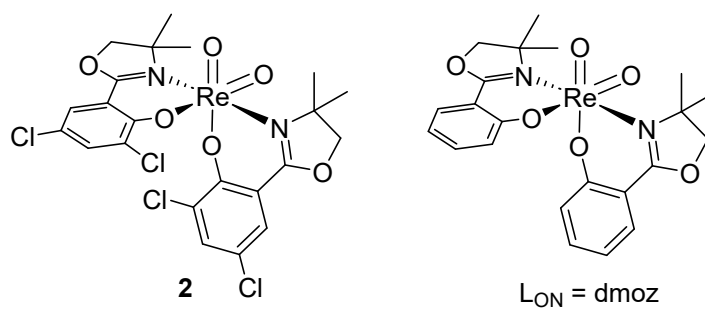

Figure S2. Dioxidorhenium(VI) complexes for structural comparison in Table S4

Table S4. Selected bond lengths [Å] of dioxidorhenium(VI) complex **2** with previously published dioxidorhenium(VI) complex

| $\text{ReO}_2(\text{L}_{\text{ON}})_2$ | $\text{L}_{\text{ON}} = \mathbf{L1, 2}$ | $\text{L}_{\text{ON}} = \text{dmoz}^{10}$ |
|----------------------------------------|-----------------------------------------|-------------------------------------------|
| Re1=O1                                 | 1.7397(13)                              | 1.745(6)                                  |
| Re1=O2 <sup>i</sup>                    | 1.7397(13)                              | 1.732(6)                                  |
| Re-O21                                 | 2.0680(12)                              | 2.061(5)                                  |
| Re1-O41 <sup>i</sup>                   | 2.0680(12)                              | 2.082(6)                                  |
| Re-N13                                 | 2.0963(14)                              | 2.098(7)                                  |
| Re-N33 <sup>i</sup>                    | 2.0963(14)                              | 2.103(7)                                  |

<sup>i</sup> equivalent atoms are generated by symmetry (two-fold rotation axis)

## NMR spectra

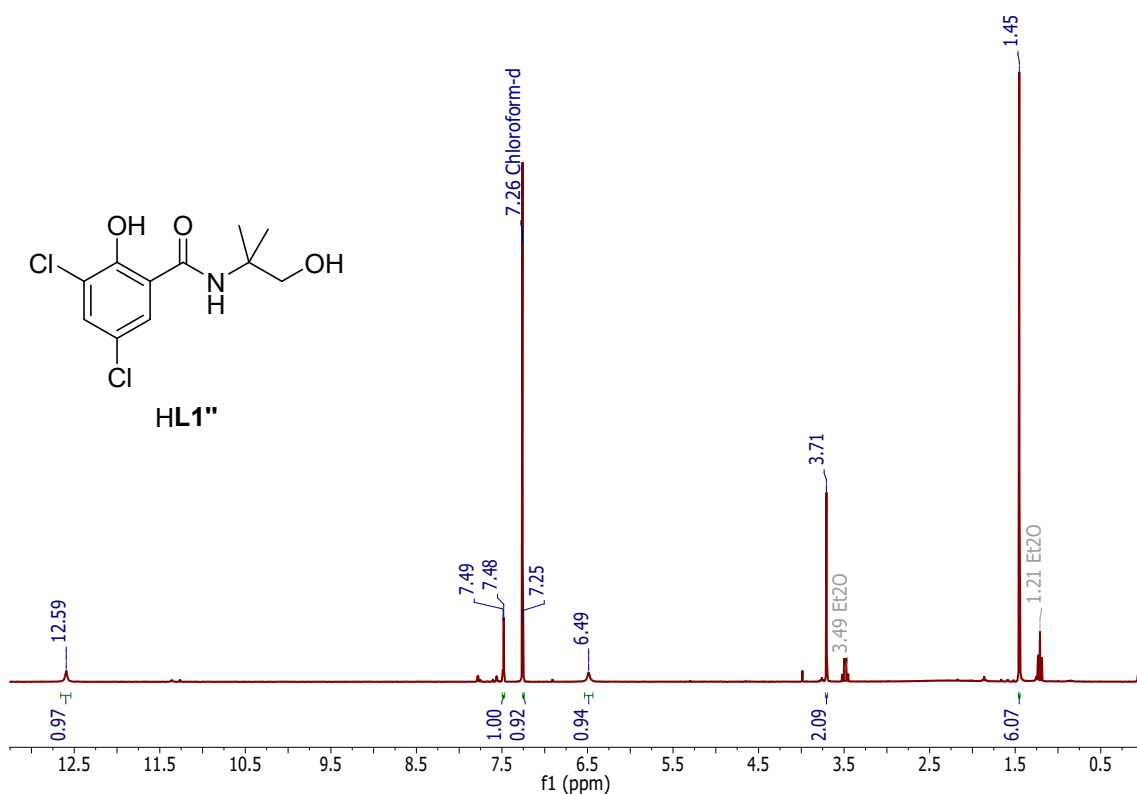

Figure S3. <sup>1</sup>H NMR spectrum of HL1'' (CDCl<sub>3</sub>).

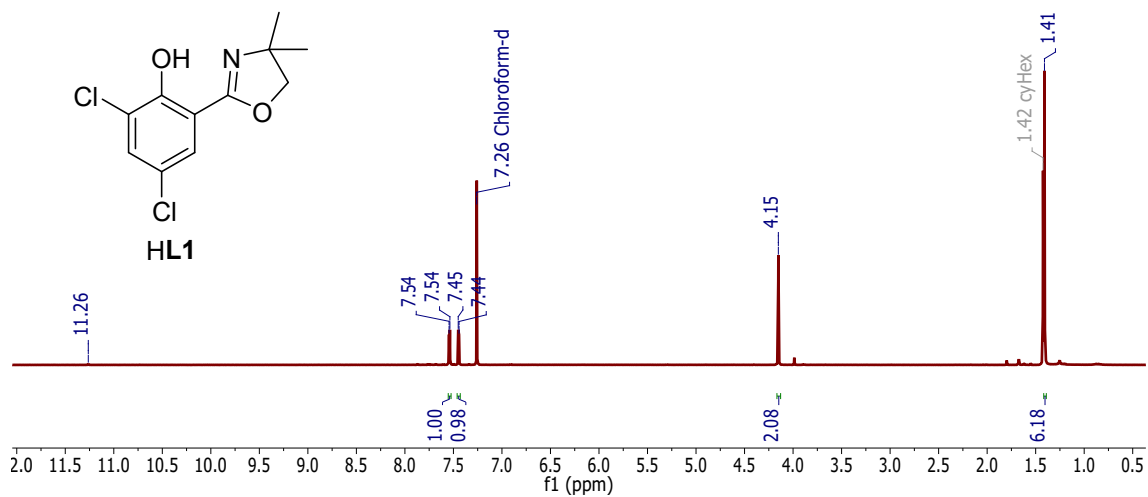

Figure S4. <sup>1</sup>H NMR spectrum of HL1 (CDCl<sub>3</sub>).

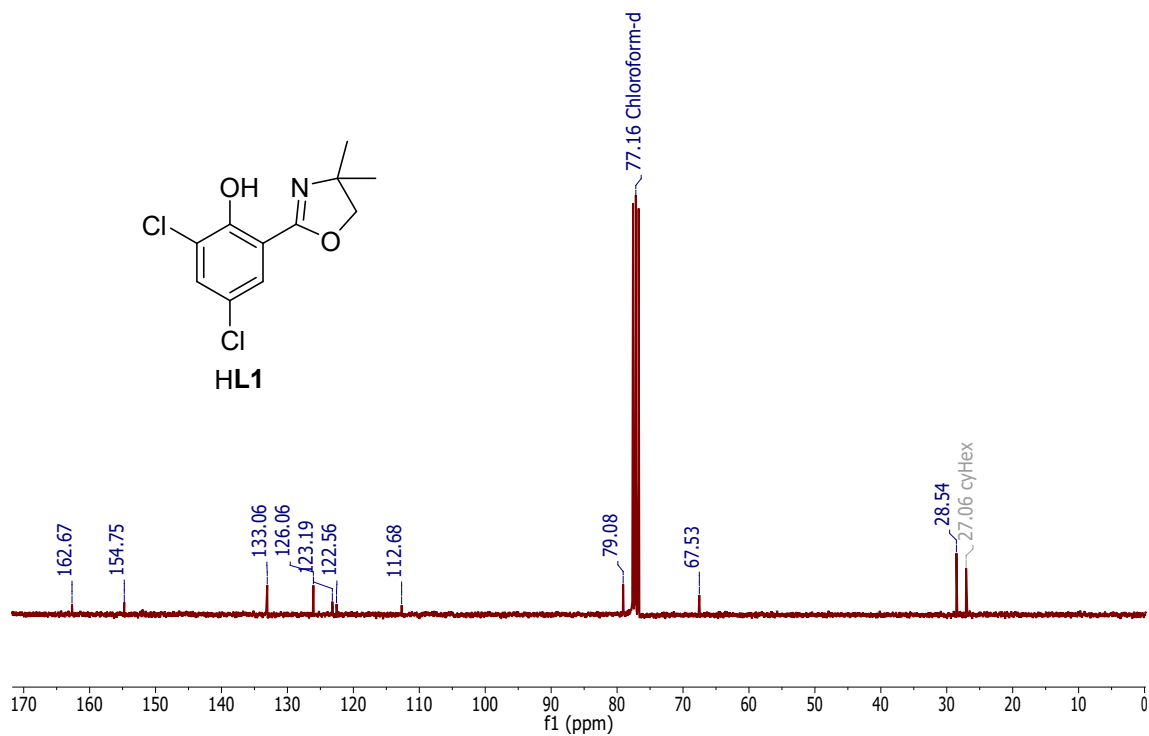

Figure S5.  $^{13}\text{C}$  NMR spectrum of HL1 ( $\text{CDCl}_3$ ).

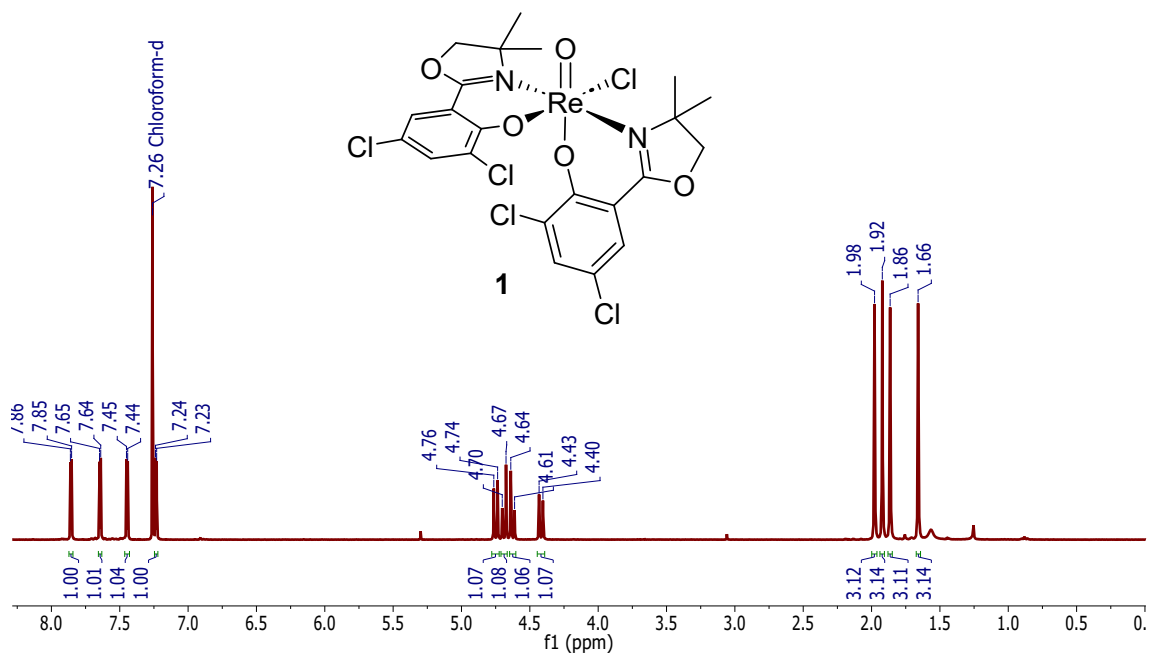

Figure S6.  $^1\text{H}$  NMR spectrum of 1 ( $\text{CDCl}_3$ ).



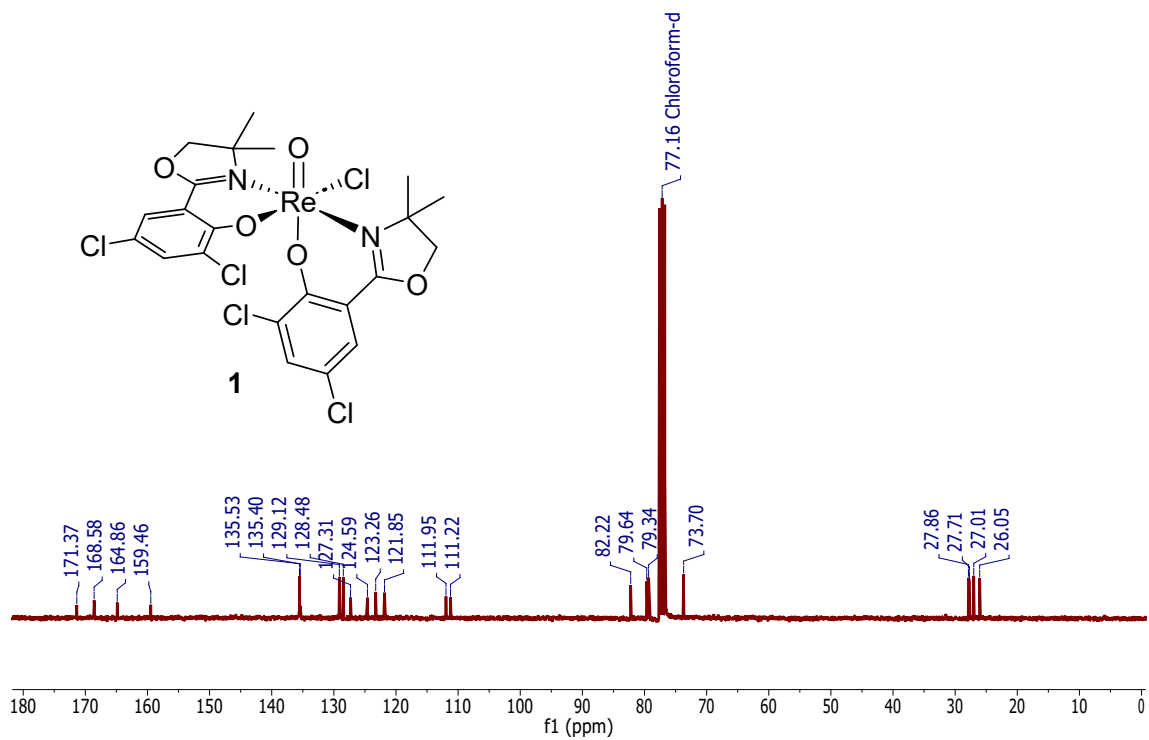

Figure S7.  $^{13}\text{C}$  NMR spectrum of **1** ( $\text{CDCl}_3$ ).

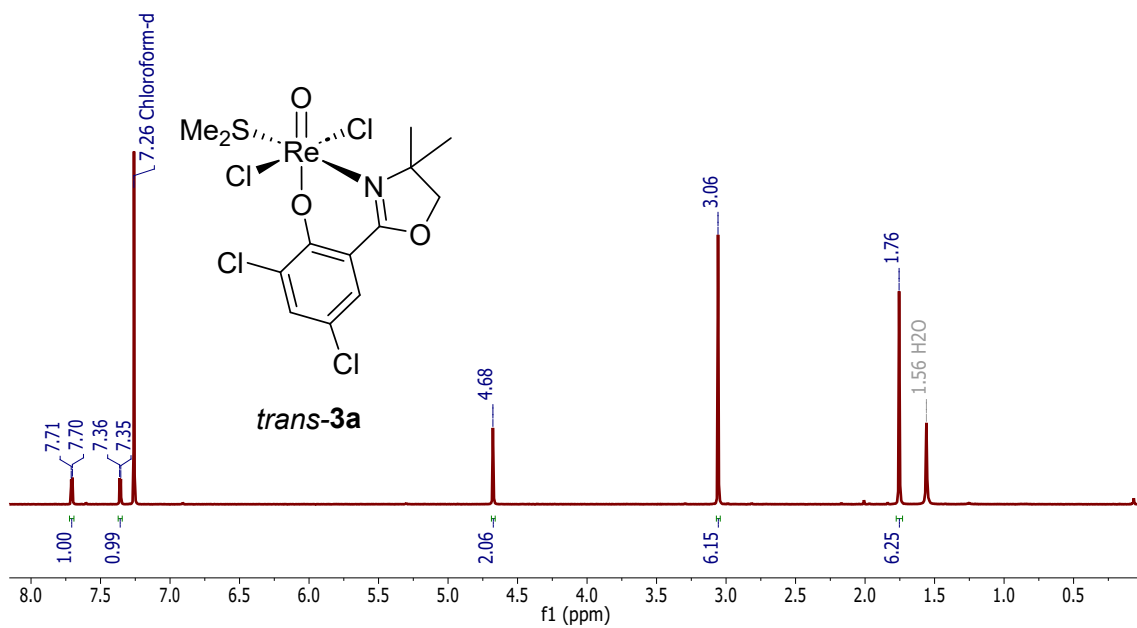

Figure S8.  $^1\text{H}$  NMR spectrum of *trans*-**3a** ( $\text{CDCl}_3$ ).

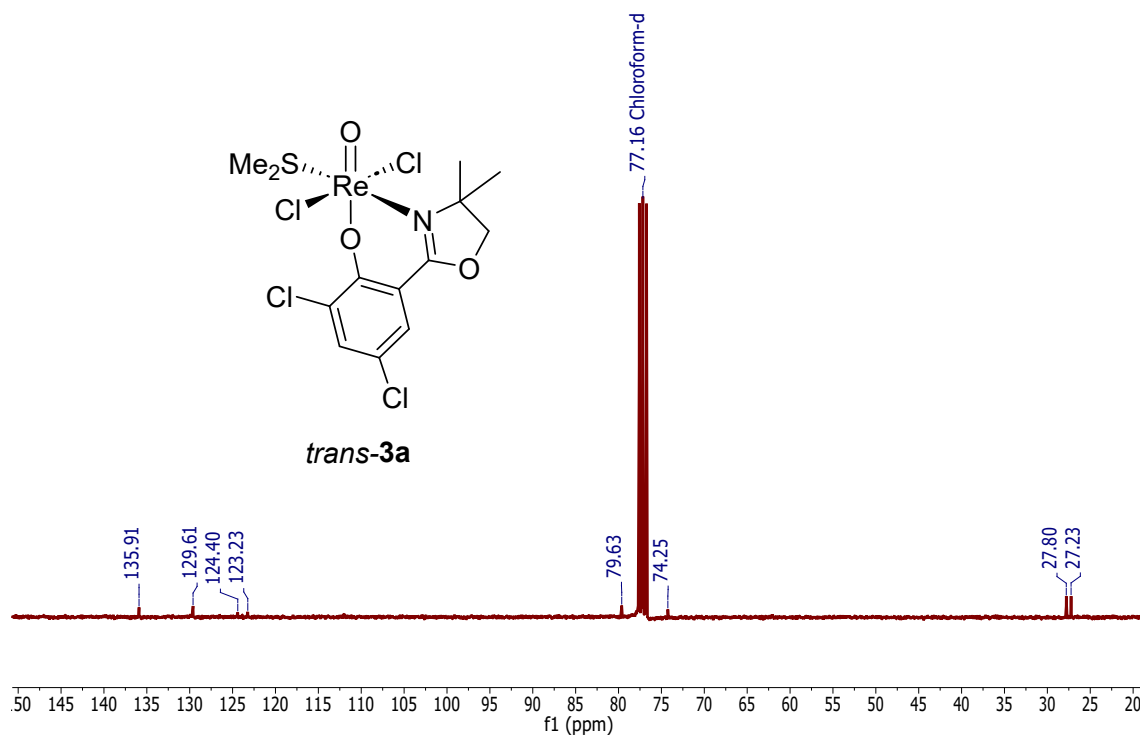

Figure S9.  $^{13}\text{C}$  NMR spectrum of *trans*-**3a** ( $\text{CDCl}_3$ ).

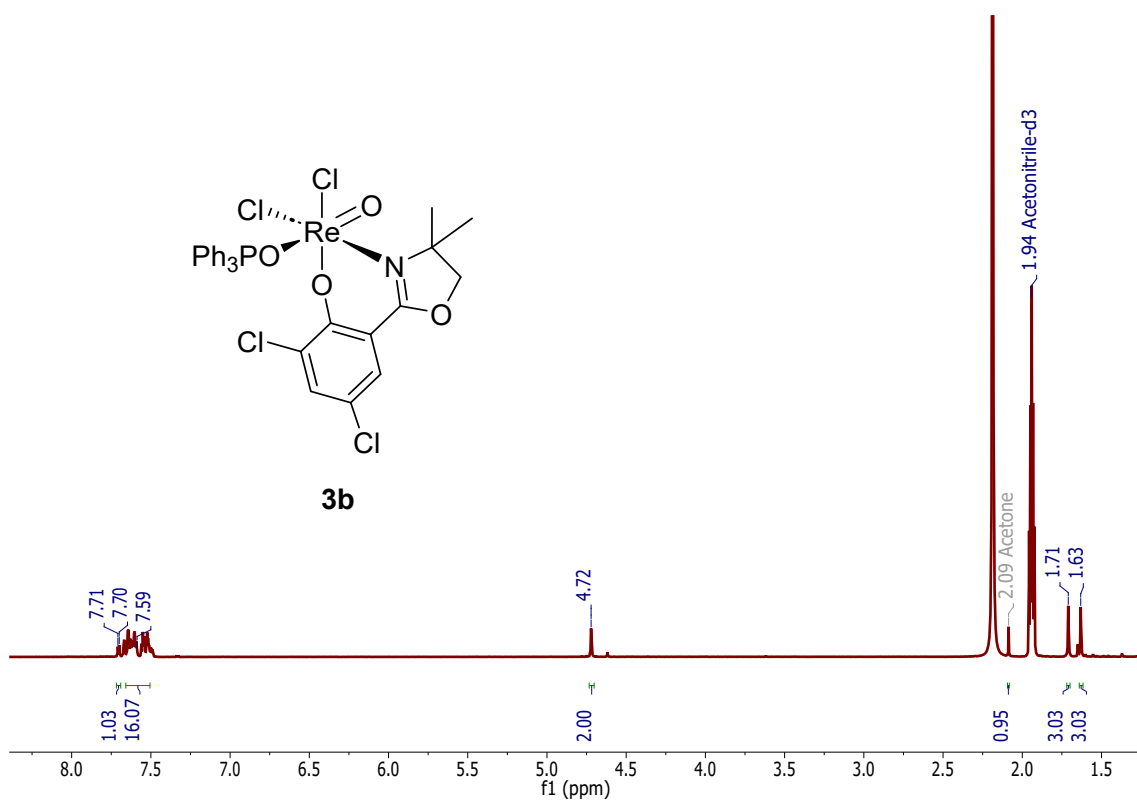

Figure S10.  $^1\text{H}$  NMR spectrum of **3b** ( $\text{CD}_3\text{CN}$ ).

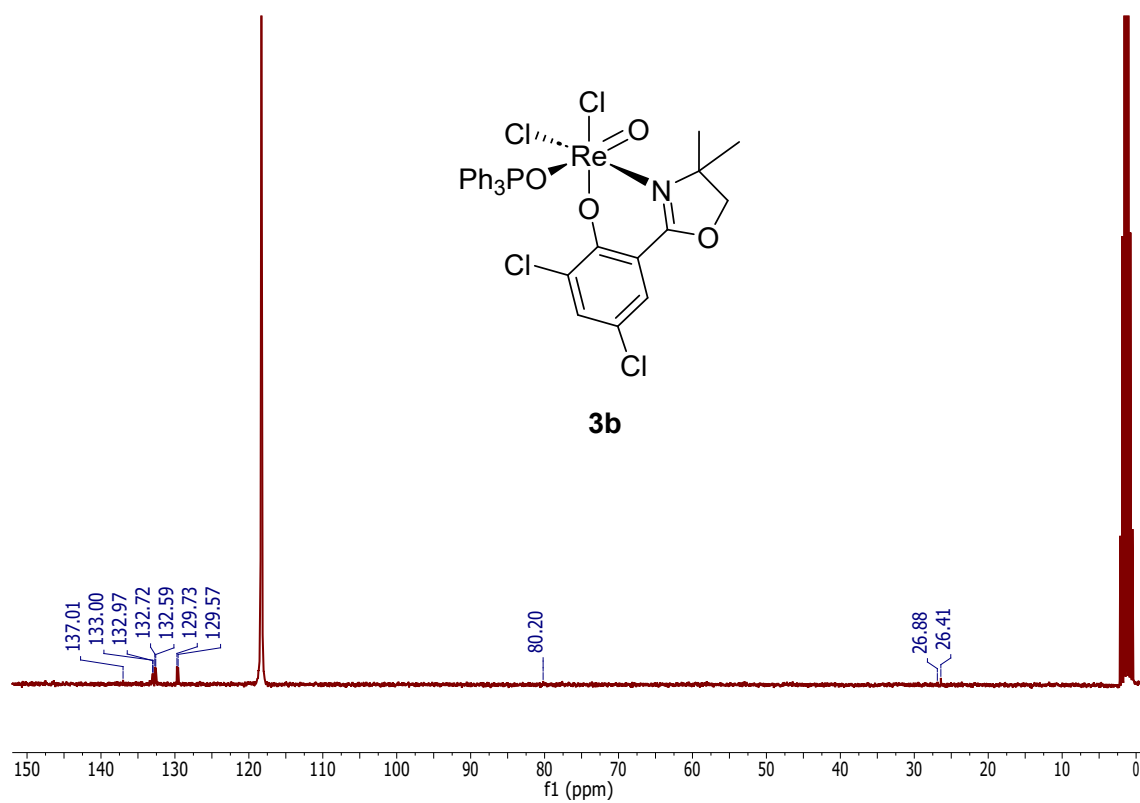

Figure S11.  $^{13}\text{C}$  NMR spectrum of **3b** ( $\text{CD}_3\text{CN}$ ).

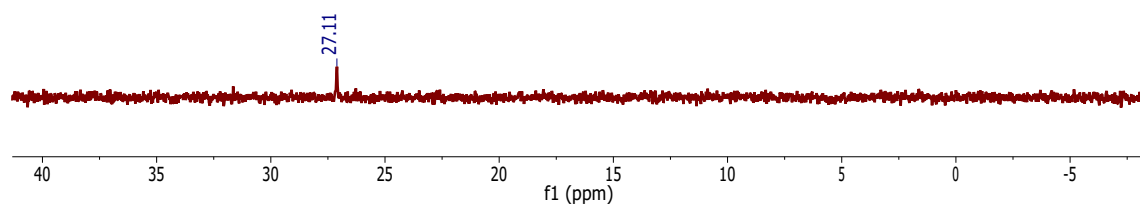

Figure S12.  $^{31}\text{P}$  NMR of **3b** ( $\text{CD}_3\text{CN}$ ).

**Cyclic voltammetry.** Electrochemical measurements were performed under an inert N<sub>2</sub> atmosphere in a glove box in dry acetonitrile (stored over molecular sieve) with a Gamry Instruments Reference 600 Potentiostat using a three electrode setup. Platin was used as working electrode, Pt wire (99.99%) as supporting electrode; the reference electrode was a Ag wire immersed in a solution of 0.01 M AgNO<sub>3</sub> and 0.1 M (NBu<sub>4</sub>)PF<sub>6</sub> in CH<sub>3</sub>CN separated from the solution by a Vycor® tip. Analyte solutions were near 1 mM with (NBu<sub>4</sub>)PF<sub>6</sub> used as supporting electrolyte (0.1 M). The currents I<sub>p</sub> were normalized by the actual concentrations to allow better comparability. All measurements were referenced to the ferrocenium (Fc<sup>+</sup>)/ferrocene (Fc) couple.

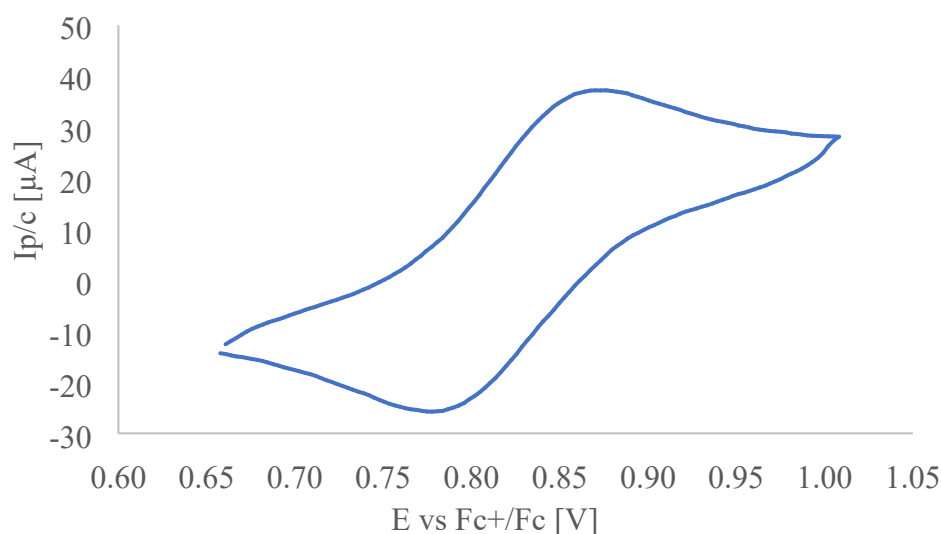

Figure S13. Cyclic voltammogram of **1**; E<sub>1/2</sub> = 0.85 V.

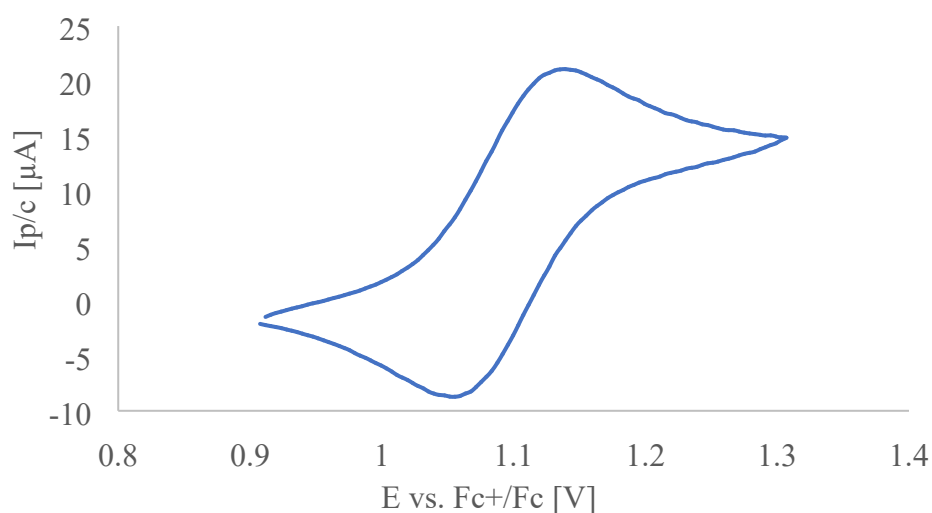

Figure S14. Cyclic voltammogram of *trans*-**3a**; E<sub>1/2</sub> = 1.10 V.

**Crystal structure determinations.** All the single crystal measurements were performed on a Bruker APEX-II CCD diffractometer at 100 K using Mo  $K_{\alpha}$  radiation with a wavelength of 0.71073 Å from an Incoatec microfocus sealed tube equipped with a multilayer monochromator. Absorption corrections were made semi-empirically from equivalents. The structures were solved by direct methods (SHELXS-97)<sup>11</sup> and refined by full-matrix least-squares techniques against  $F^2$  (SHELXL-2014/6)<sup>12</sup>. A weighting scheme of  $w = 1/[\sigma^2(F_o^2)+(aP)^2+bP]$  where  $P = (F_o^2+2F_c^2)/3$  was used. The absolute configurations of **HL1** and of *trans*-**3a** were established by anomalous dispersion effects in the diffraction measurements on the crystals. The non-hydrogen atoms were refined with anisotropic displacement parameters without any constraints. The position of the H atom of the OH group of **HL1** was taken from a difference Fourier map, the O–H distance was fixed to 0.84 Å, and this H atom was refined with an individual isotropic displacement parameter without any constraints to the bond angles. The H atoms of the phenyl rings were put at the external bisectors of the C–C–C angles at C–H distances of 0.95 Å and common isotropic displacement parameters were refined for the H atoms of the same ring. The H atoms of the CH<sub>2</sub> groups were refined with common isotropic displacement parameters for the H atoms of the same group and idealized geometries with approximately tetrahedral angles and C–H distances of 0.99 Å. The H atoms of the methyl groups were refined with common isotropic displacement parameters for the H atoms of the same group and idealized geometries with tetrahedral angles, enabling rotations around the C–C bonds, and C–H distances of 0.98 Å. Crystal data, data collection parameters and structure refinement details are given in the following. Further refinement information, structure and bonding parameters, SHELXL .res and .hkl files are given in the deposited CIF file which is available free of charge from The Cambridge Crystallographic Data Centre (CCDC 1913789, 1913787, 1854790-1854792, 1995752).

Table S5. Crystallographic data and structure refinement details of HL1 and 1.

| <b>Crystal data</b>                   | <b>HL1</b>                                                      | <b>1</b>                                                                         |
|---------------------------------------|-----------------------------------------------------------------|----------------------------------------------------------------------------------|
| CIF data code                         | JSJZ15                                                          | JSJZ2B                                                                           |
| Empirical formula                     | C <sub>11</sub> H <sub>11</sub> Cl <sub>2</sub> NO <sub>2</sub> | C <sub>22</sub> H <sub>20</sub> Cl <sub>5</sub> N <sub>2</sub> O <sub>5</sub> Re |
| Formula weight                        | 260.11                                                          | 755.85                                                                           |
| Crystal description                   | plate, colourless                                               | plate, green                                                                     |
| Crystal size                          | 0.36 x 0.14 x 0.03mm                                            | 0.31 x 0.27 x 0.04mm                                                             |
| Temperature                           | 100K                                                            | 100K                                                                             |
| Crystal system                        | monoclinic                                                      | monoclinic                                                                       |
| Space group                           | C c                                                             | P 2 <sub>1</sub> /n                                                              |
| a                                     | 7.4471(9)Å                                                      | 11.0483(15)Å                                                                     |
| b                                     | 23.852(4)Å                                                      | 12.4028(17)Å                                                                     |
| c                                     | 6.8468(8)Å                                                      | 37.115(5)Å                                                                       |
| $\alpha$                              |                                                                 |                                                                                  |
| $\beta$                               | 107.136(7)°                                                     | 93.108(6)°                                                                       |
| $\gamma$                              |                                                                 |                                                                                  |
| Volume                                | 1162.2(3)Å <sup>3</sup>                                         | 5078.4(12)Å <sup>3</sup>                                                         |
| Z                                     | 4                                                               | 8                                                                                |
| Calc. density                         | 1.487Mg/m <sup>3</sup>                                          | 1.977Mg/m <sup>3</sup>                                                           |
| F(000)                                | 536                                                             | 2928                                                                             |
| Linear absorption coefficient $\mu$   | 0.542mm <sup>-1</sup>                                           | 5.349mm <sup>-1</sup>                                                            |
| Max. and min. transmission            | 1.000 and 0.613                                                 | 1.000 and 0.640                                                                  |
| Unit cell determination               | 2.99° < $\Theta$ < 28.73°                                       | 2.47° < $\Theta$ < 26.84°                                                        |
| Reflections used                      | 4813                                                            | 9774                                                                             |
| <b>Data collection</b>                |                                                                 |                                                                                  |
| $\Theta$ range for data collection    | 2.99 to 29.99°                                                  | 1.73 to 26.00°                                                                   |
| Reflections collected / unique        | 17577 / 3384                                                    | 25840 / 9991                                                                     |
| Significant unique reflections        | 2846 with I > 2 $\sigma$ (I)                                    | 7907 with I > 2 $\sigma$ (I)                                                     |
| R(int), R(sigma)                      | 0.0857, 0.0675                                                  | 0.0378, 0.0676                                                                   |
| Completeness to $\Theta_{\max}$       | 99.9%                                                           | 99.9%                                                                            |
| <b>Refinement</b>                     |                                                                 |                                                                                  |
| Data / parameters / restraints        | 3384 / 155 / 3                                                  | 9991 / 655 / 0                                                                   |
| Goodness-of-fit on F <sup>2</sup>     | 1.008                                                           | 1.007                                                                            |
| Final R indices [I > 2 $\sigma$ (I)]  | R1 = 0.0365,<br>wR2 = 0.0713                                    | R1 = 0.0447,<br>wR2 = 0.1110                                                     |
| R indices (all data)                  | R1 = 0.0505,<br>wR2 = 0.0762                                    | R1 = 0.0546,<br>wR2 = 0.1147                                                     |
| Weighting scheme param. a, b          | 0.0257, 0.0000                                                  | 0.0650, 0.0000                                                                   |
| Largest $\Delta/\sigma$ in last cycle | 0.001                                                           | 0.002                                                                            |
| Largest diff. peak and hole           | 0.277 and -0.258e/Å <sup>3</sup>                                | 1.794 and -1.740e/Å <sup>3</sup>                                                 |
| <b>CCDC no.</b>                       | 1913789                                                         | 1913787                                                                          |

Table S7. Crystallographic data and structure refinement details of **2** and *trans-3a*.

| <b>Crystal data</b>                   | <b>2</b>                                                                         | <i>trans-3a</i>                                                     |
|---------------------------------------|----------------------------------------------------------------------------------|---------------------------------------------------------------------|
| CIF data code                         | JSJZ21                                                                           | JS76IV                                                              |
| Empirical formula                     | C <sub>22</sub> H <sub>20</sub> Cl <sub>4</sub> N <sub>2</sub> O <sub>6</sub> Re | C <sub>13</sub> H <sub>16</sub> Cl <sub>4</sub> NO <sub>3</sub> ReS |
| Formula weight                        | 736.40                                                                           | 594.33                                                              |
| Crystal description                   | block, orange                                                                    | block, green                                                        |
| Crystal size                          | 0.28 x 0.13 x 0.09mm                                                             | 0.24 x 0.24 x 0.15mm                                                |
| Temperature                           | 100K                                                                             | 100K                                                                |
| Crystal system                        | orthorhombic                                                                     | monoclinic                                                          |
| Space group                           | P c c n                                                                          | C c                                                                 |
| a                                     | 16.202(3)Å                                                                       | 8.3972(12)Å                                                         |
| b                                     | 16.335(3)Å                                                                       | 32.451(5)Å                                                          |
| c                                     | 18.805(3)Å                                                                       | 6.6411(11)Å                                                         |
| $\alpha$                              |                                                                                  |                                                                     |
| $\beta$                               |                                                                                  | 94.071(5)°                                                          |
| $\gamma$                              |                                                                                  |                                                                     |
| Volume                                | 4976.9(15)Å <sup>3</sup>                                                         | 1805.1(5)Å <sup>3</sup>                                             |
| Z                                     | 8                                                                                | 4                                                                   |
| Calc. density                         | 1.966Mg/m <sup>3</sup>                                                           | 2.187Mg/m <sup>3</sup>                                              |
| F(000)                                | 2856                                                                             | 1136                                                                |
| Linear absorption coefficient $\mu$   | 5.355mm <sup>-1</sup>                                                            | 7.450mm <sup>-1</sup>                                               |
| Max. and min. transmission            | 1.000 and 0.593                                                                  | 0.747 and 0.455                                                     |
| Unit cell determination               | 2.50° < $\Theta$ < 40.71°                                                        | 2.51° < $\Theta$ < 35.74°                                           |
| Reflections used                      | 9744                                                                             | 9365                                                                |
| <b>Data collection</b>                |                                                                                  |                                                                     |
| $\Theta$ range for data collection    | 1.77 to 40.00°                                                                   | 2.51 to 35.00°                                                      |
| Reflections collected / unique        | 77915 / 15402                                                                    | 16795 / 6728                                                        |
| Significant unique reflections        | 10723 with I > 2 $\sigma$ (I)                                                    | 6295 with I > 2 $\sigma$ (I)                                        |
| R(int), R(sigma)                      | 0.0542, 0.0424                                                                   | 0.0417, 0.0475                                                      |
| Completeness to $\Theta_{\max}$       | 99.9%                                                                            | 99.9%                                                               |
| <b>Refinement</b>                     |                                                                                  |                                                                     |
| Data / parameters / restraints        | 15402 / 330 / 0                                                                  | 6728 / 218 / 2                                                      |
| Goodness-of-fit on F <sup>2</sup>     | 1.018                                                                            | 1.034                                                               |
| Final R indices [I > 2 $\sigma$ (I)]  | R1 = 0.0283,<br>wR2 = 0.0605                                                     | R1 = 0.0298,<br>wR2 = 0.0663                                        |
| R indices (all data)                  | R1 = 0.0501,<br>wR2 = 0.0686                                                     | R1 = 0.0349,<br>wR2 = 0.0690                                        |
| Weighting scheme param. a, b          | 0.0217, 2.4883                                                                   | 0.0381, 0.0000                                                      |
| Largest $\Delta/\sigma$ in last cycle | 0.002                                                                            | 0.003                                                               |
| Largest diff. peak and hole           | 1.776 and -1.583e/Å <sup>3</sup>                                                 | 1.847 and -1.429e/Å <sup>3</sup>                                    |
| <b>CCDC no.</b>                       | 1995752                                                                          | 1854790                                                             |

Table S8. Crystallographic data and structure refinement details of **3b** and **3c**.

| <b>Crystal data</b>               | <b>3b</b>                                                           | <b>3c</b>                                                           |
|-----------------------------------|---------------------------------------------------------------------|---------------------------------------------------------------------|
| CIF data code                     | JS76                                                                | JS76V                                                               |
| Empirical formula                 | C <sub>29</sub> H <sub>25</sub> Cl <sub>4</sub> NO <sub>4</sub> PRE | C <sub>29</sub> H <sub>25</sub> Cl <sub>5</sub> NO <sub>3</sub> PRE |
| Formula weight                    | 810.47                                                              | 829.92                                                              |
| Crystal description               | plate, green                                                        | plate, orange                                                       |
| Crystal size                      | 0.25 x 0.17 x 0.07mm                                                | 0.16 x 0.08 x 0.04mm                                                |
| Temperature                       | 100K                                                                | 100K                                                                |
| Crystal system                    | monoclinic                                                          | triclinic                                                           |
| Space group                       | P 2 <sub>1</sub> /n                                                 | P -1                                                                |
| a                                 | 11.6314(5)Å                                                         | 9.9619(18)Å                                                         |
| b                                 | 20.2311(9)Å                                                         | 10.0674(18)Å                                                        |
| c                                 | 12.6581(6)Å                                                         | 17.161(3)Å                                                          |
| α                                 |                                                                     | 73.649(5)°                                                          |
| β                                 | 101.269(2)°                                                         | 76.698(5)°                                                          |
| γ                                 |                                                                     | 71.136(6)°                                                          |
| Volume                            | 2921.2(2)Å <sup>3</sup>                                             | 1544.3(5)Å <sup>3</sup>                                             |
| Z                                 | 4                                                                   | 2                                                                   |
| Calc. density                     | 1.843Mg/m <sup>3</sup>                                              | 1.785Mg/m <sup>3</sup>                                              |
| F(000)                            | 1584                                                                | 810                                                                 |
| Linear absorption coefficient μ   | 4.617mm <sup>-1</sup>                                               | 4.451mm <sup>-1</sup>                                               |
| Max. and min. transmission        | 1.000 and 0.719                                                     | 1.000 and 0.624                                                     |
| Unit cell determination           | 2.40° < Θ < 30.49°                                                  | 2.35° < Θ < 23.47°                                                  |
| Reflections used                  | 8513                                                                | 5384                                                                |
| <b>Data collection</b>            |                                                                     |                                                                     |
| Θ range for data collection       | 1.92 to 30.00°                                                      | 2.19 to 26.00°                                                      |
| Reflections collected / unique    | 26705 / 8522                                                        | 27366 / 6063                                                        |
| Significant unique reflections    | 6802 with I > 2σ(I)                                                 | 4977 with I > 2σ(I)                                                 |
| R(int), R(sigma)                  | 0.0505, 0.0558                                                      | 0.0893, 0.0721                                                      |
| Completeness to Θ <sub>max</sub>  | 99.9%                                                               | 99.9%                                                               |
| <b>Refinement</b>                 |                                                                     |                                                                     |
| Data / parameters / restraints    | 8522 / 370 / 0                                                      | 6063 / 370 / 0                                                      |
| Goodness-of-fit on F <sup>2</sup> | 1.014                                                               | 1.029                                                               |
| Final R indices [I > 2σ(I)]       | R1 = 0.0343,<br>wR2 = 0.0732                                        | R1 = 0.0359,<br>wR2 = 0.0630                                        |
| R indices (all data)              | R1 = 0.0512,<br>wR2 = 0.0789                                        | R1 = 0.0534,<br>wR2 = 0.0685                                        |
| Weighting scheme param. a, b      | 0.0305, 2.1365                                                      | 0.0174, 1.0201                                                      |
| Largest Δ/σ in last cycle         | 0.004                                                               | 0.001                                                               |
| Largest diff. peak and hole       | 1.982 and -1.204e/Å <sup>3</sup>                                    | 0.973 and -1.207e/Å <sup>3</sup>                                    |
| <b>CCDC no.</b>                   | 1854791                                                             | 1854792                                                             |



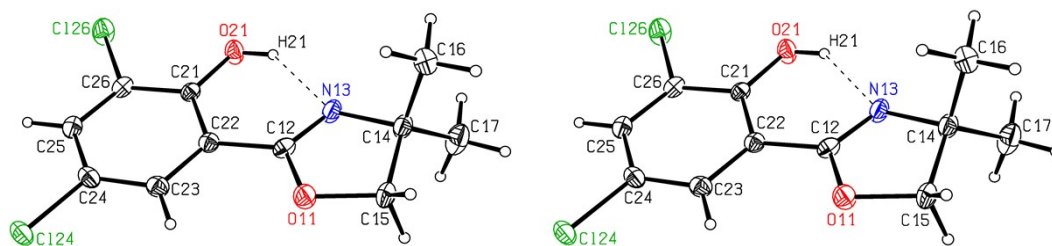

Figure S15. Stereoscopic ORTEP<sup>13</sup> plot of HL1 showing the atomic numbering scheme. The probability ellipsoids are drawn at the 50% probability level. The H atoms are drawn with arbitrary radii. The hydrogen bond is indicated by a dashed line.

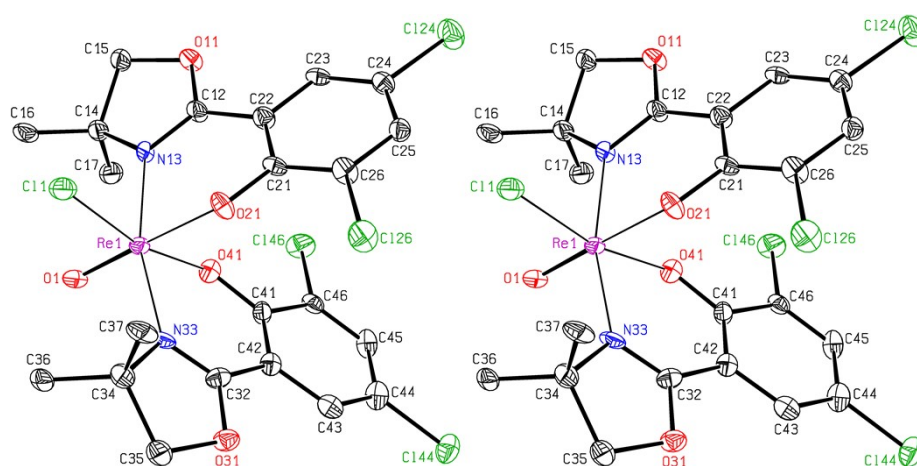

Figure S16. Stereoscopic ORTEP<sup>13</sup> plot of complex **A** of **1** showing the atomic numbering scheme. The probability ellipsoids are drawn at the 50% probability level. The H atoms were omitted for clarity.

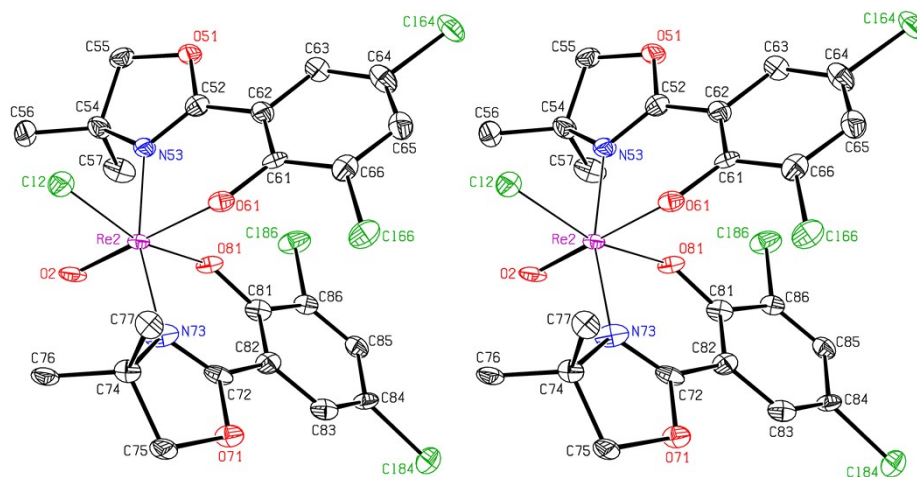

Figure S17. Stereoscopic ORTEP<sup>13</sup> plot of complex **B** of **1** showing the atomic numbering scheme. The probability ellipsoids are drawn at the 50% probability level. The H atoms were omitted for clarity.

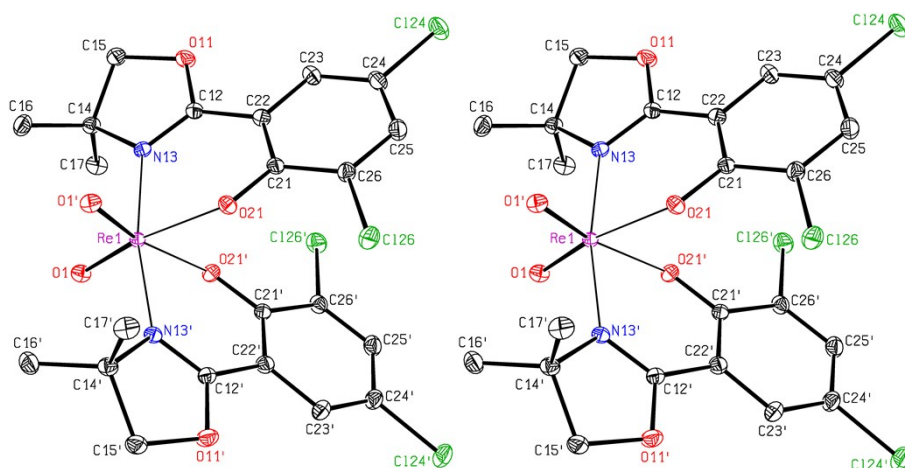

Figure S18. Stereoscopic ORTEP<sup>13</sup> plot of complex **A** of **2** showing the atomic numbering scheme. The probability ellipsoids are drawn at the 50% probability level. The H atoms were omitted for clarity.

Table S8. Selected bond lengths [Å] and angles [°] for **1**.

|         |            |             |            |             |            |
|---------|------------|-------------|------------|-------------|------------|
| Re1-O1  | 1.700(5)   | O1-Re1-O21  | 177.7(2)   | O2-Re2-O61  | 179.66(19) |
| Re1-O21 | 2.016(4)   | N13-Re1-N33 | 164.7(2)   | N53-Re2-N73 | 164.7(2)   |
| Re1-O41 | 2.006(4)   | O41-Re1-C11 | 167.46(13) | O81-Re2-C12 | 166.14(13) |
| Re1-N13 | 2.106(5)   | C12-N13-C14 | 106.2(5)   | C52-N53-C54 | 105.6(5)   |
| Re1-N33 | 2.096(5)   | C12-N13-Re1 | 126.6(4)   | C52-N53-Re2 | 126.7(4)   |
| Re1-C11 | 2.3960(17) | C14-N13-Re1 | 125.6(4)   | C54-N53-Re2 | 125.8(4)   |
| Re2-O2  | 1.690(5)   | C21-O21-Re1 | 131.8(4)   | C61-O61-Re2 | 130.8(4)   |
| Re2-O61 | 2.012(4)   | C32-N33-C34 | 107.9(5)   | C72-N73-C74 | 105.9(5)   |
| Re2-O81 | 1.985(4)   | C32-N33-Re1 | 123.7(4)   | C72-N73-Re2 | 123.3(4)   |
| Re2-N53 | 2.107(5)   | C34-N33-Re1 | 128.1(4)   | C74-N73-Re2 | 130.1(4)   |
| Re2-N73 | 2.070(5)   | C41-O41-Re1 | 127.9(4)   | C81-O81-Re2 | 129.4(4)   |
| Re2-C12 | 2.4103(17) |             |            |             |            |

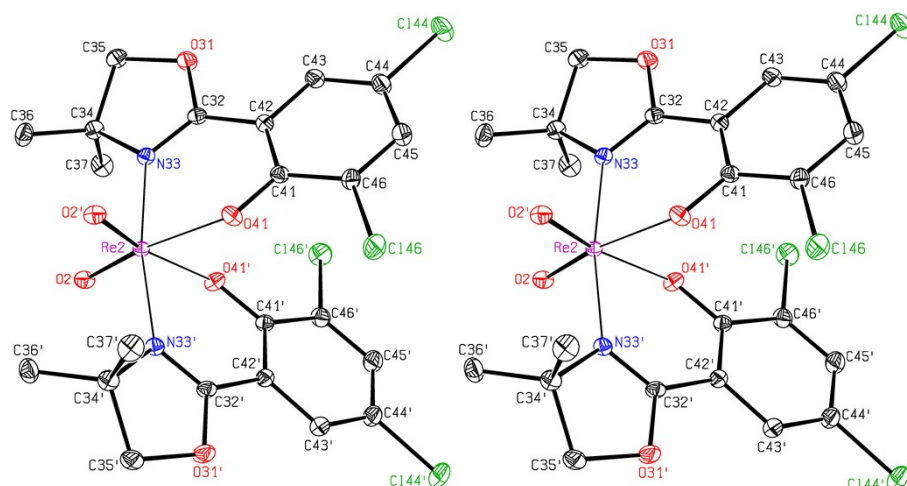

Figure S19. Stereoscopic ORTEP<sup>13</sup> plot of complex **B** of **2** showing the atomic numbering scheme. The probability ellipsoids are drawn at the 50% probability level. The H atoms were omitted for clarity.

Table S9. Selected bond lengths [Å] and angles [°] for **2**.

|         |            |                          |            |                           |            |
|---------|------------|--------------------------|------------|---------------------------|------------|
| Re1-O1  | 1.7397(13) | O1-Re1-O21               | 164.36(5)  | O2-Re2-O41                | 164.32(6)  |
| Re1-O21 | 2.0680(12) | N13-Re1-N13 <sup>i</sup> | 169.04(7)  | N33-Re2-N33 <sup>ii</sup> | 170.21(7)  |
| Re1-N13 | 2.0963(14) | C12-N13-C14              | 108.18(13) | C32-N33-C34               | 107.60(14) |
| Re2-O2  | 1.7342(13) | C12-N13-Re1              | 125.37(11) | C32-N33-Re2               | 125.81(11) |
| Re2-O41 | 2.0689(12) | C14-N13-Re1              | 126.08(10) | C34-N33-Re2               | 126.44(11) |
| Re2-N33 | 2.0984(15) | C21-O21-Re1              | 128.44(11) | C41-O41-Re2               | 128.54(11) |

Symmetry transformations used to generate equivalent atoms:

i)  $1/2-x, 1/2-y, z$     ii)  $3/2-x, 1/2-y, z$

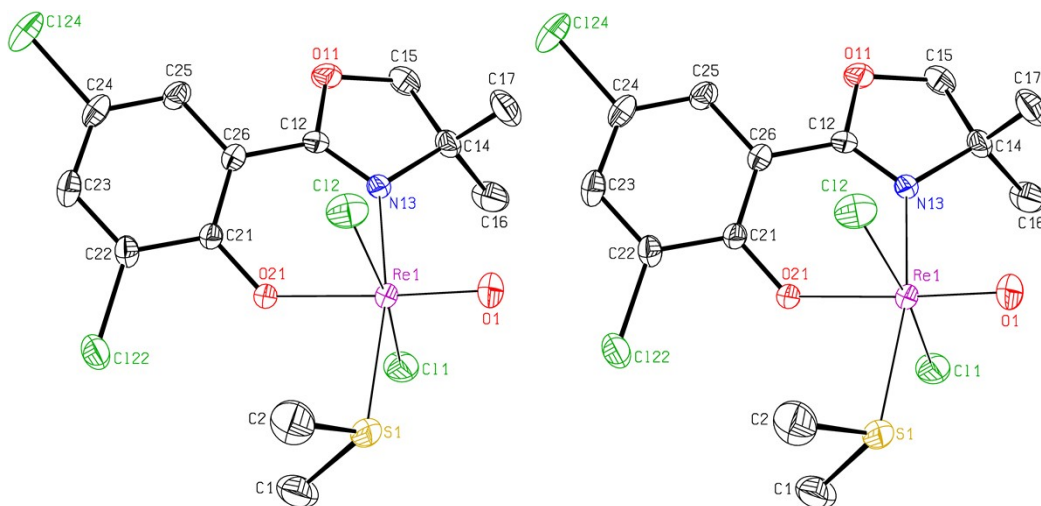

Figure S20. Stereoscopic ORTEP<sup>13</sup> plot of *trans*-**3a** showing the atomic numbering scheme. The probability ellipsoids are drawn at the 50% probability level. The H atoms were omitted for clarity.

Table S10. Selected bond lengths [Å] and angles [°] for *trans*-**3a**.

|         |            |             |            |
|---------|------------|-------------|------------|
| Re1-O1  | 1.677(4)   | O1-Re1-O21  | 176.68(19) |
| Re1-N13 | 2.113(5)   | Cl1-Re1-Cl2 | 171.43(5)  |
| Re1-O21 | 1.989(3)   | N13-Re1-S1  | 169.08(11) |
| Re1-Cl1 | 2.3846(15) | C12-N13-C14 | 107.7(4)   |
| Re1-Cl2 | 2.4057(14) | C12-N13-Re1 | 125.8(3)   |
| Re1-S1  | 2.4238(15) | C14-N13-Re1 | 125.8(3)   |
| S1-C2   | 1.799(8)   | C21-O21-Re1 | 131.0(3)   |
| S1-C1   | 1.803(8)   | C1-S1-C2    | 99.5(4)    |
|         |            | C1-S1-Re1   | 107.0(3)   |
|         |            | C2-S1-Re1   | 110.1(3)   |

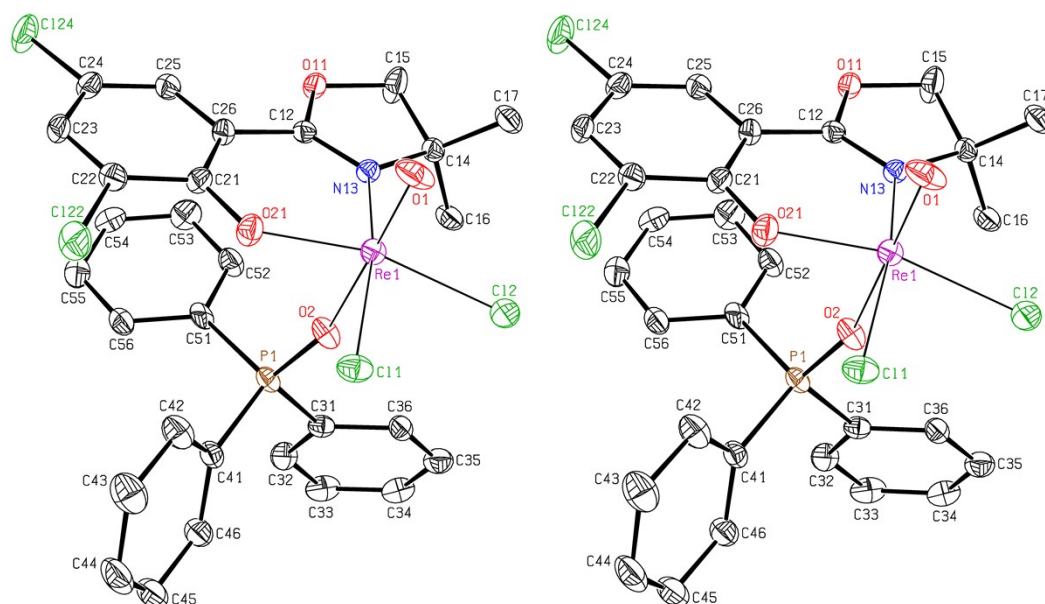

Figure S21. Stereoscopic ORTEP<sup>13</sup> plot of **3b** showing the atomic numbering scheme. The probability ellipsoids are drawn at the 50% probability level. The H atoms were omitted for clarity.

Table S11. Selected bond lengths [Å] and angles [°] for **3b**.

|         |            |             |            |
|---------|------------|-------------|------------|
| Re1-O1  | 1.692(3)   | O1-Re1-O2   | 173.90(12) |
| Re1-O2  | 2.141(3)   | N13-Re1-Cl1 | 167.70(9)  |
| Re1-N13 | 2.107(3)   | O21-Re1-Cl2 | 164.76(9)  |
| Re1-O21 | 1.998(2)   | Cl1-Re1-Cl2 | 87.75(3)   |
| Re1-Cl1 | 2.3670(9)  | C12-N13-C14 | 108.5(3)   |
| Re1-Cl2 | 2.3858(10) | C12-N13-Re1 | 122.9(2)   |
| O2-P1   | 1.510(3)   | C14-N13-Re1 | 128.5(2)   |
|         |            | C21-O21-Re1 | 129.9(2)   |
|         |            | P1-O2-Re1   | 159.66(17) |

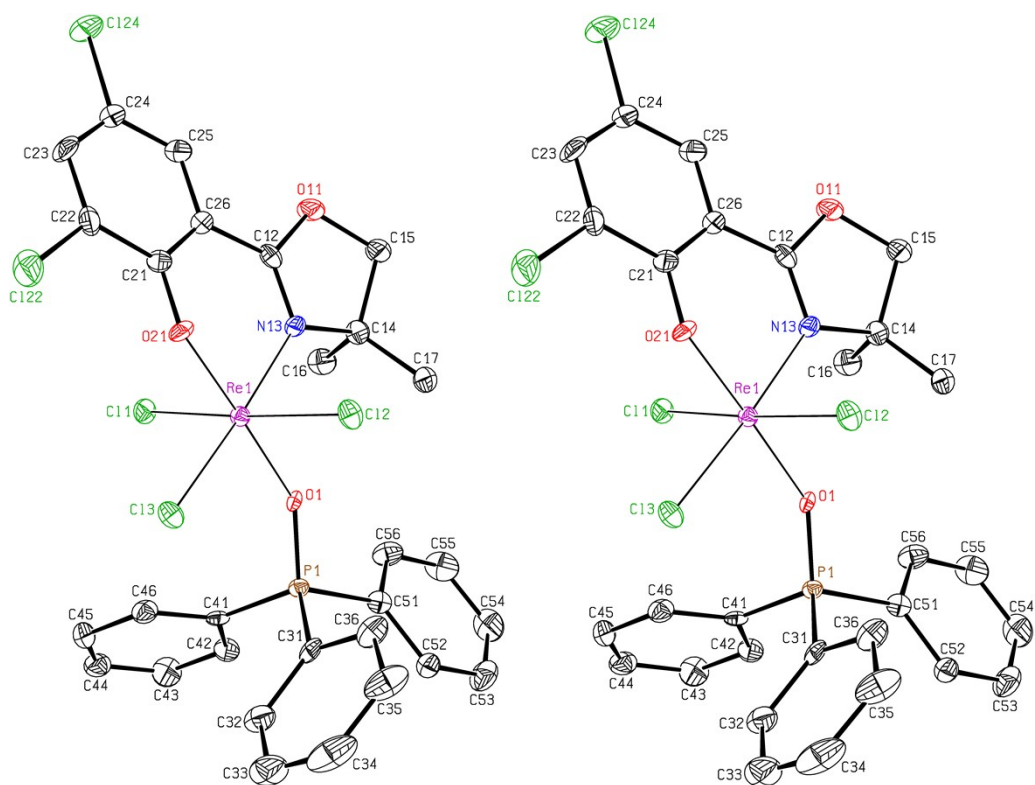

Figure S22. Stereoscopic ORTEP<sup>13</sup> plot of **3c** showing the atomic numbering scheme. The probability ellipsoids are drawn at the 50% probability level. The H atoms were omitted for clarity.

Table S12. Selected bond lengths [Å] and angles [°] for **3c**.

|         |            |             |            |
|---------|------------|-------------|------------|
| Re1-O1  | 2.053(3)   | O1-Re1-O21  | 177.55(13) |
| Re1-N13 | 2.105(4)   | N13-Re1-Cl3 | 175.08(11) |
| Re1-O21 | 1.974(3)   | Cl1-Re1-Cl2 | 175.67(4)  |
| Re1-Cl1 | 2.3443(12) | C12-N13-C14 | 107.0(4)   |
| Re1-Cl2 | 2.3522(12) | C12-N13-Re1 | 123.5(3)   |
| Re1-Cl3 | 2.3268(12) | C14-N13-Re1 | 129.1(3)   |
| O1-P1   | 1.534(3)   | C21-O21-Re1 | 127.6(3)   |
|         |            | P1-O1-Re1   | 144.71(19) |

1. A. Itai, S. Muto, R. Tokuyama, H. Fukasawa and T. Yanase, *Preparation of thiazinone and benzothiazinone derivatives and analogs as inhibitors of 11 $\beta$ -hydroxysteroid dehydrogenase type I for treatment of diabetes: European Patent Application* WO2009038064A1(EP2208728A1), 2010.
2. L. N. Pridgen and G. Miller, *J. Heterocycl. Chem.*, 1983, **20**, 1223–1230.
3. J. A. Schachner, B. Berner, F. Belaj and N. C. Mösch-Zanetti, *Dalton Trans.*, 2019, **48**, 8106-8115.
4. L. Hansen, E. Alessio, M. Iwamoto, P. A. Marzilli and L. G. Marzilli, *Inorg. Chim. Acta*, 1995, **240**, 413–417.
5. a) U. Abram, A. Voigt, R. Kirmse, K. Ortner, R. Hübener, R. Carballo and E. M. Vázquez-López, *Z. Anorg. Allg. Chem.*, 1998, **624**, 1662–1668; b) T. Ohashi, Y. Miyashita, Y. Yamada, K. Fujisawa and K. Okamoto, *Bull. Chem. Soc. Jpn.*, 2003, **76**, 1199–1205; c) S. Fortin and A. L. Beauchamp, *Inorg. Chem.*, 2000, **39**, 4886–4893; d) B. Machura, A. Świtlicka, M. Wolff and J. Kusz, *Struct. Chem.*, 2009, **20**, 911–918;
6. a) K. A. Nolin, R. W. Ahn, Y. Kobayashi, J. J. Kennedy-Smith and F. D. Toste, *Chem. Eur. J.*, 2010, **16**, 9555–9562; b) K. A. Nolin, R. W. Ahn and F. D. Toste, *J. Am. Chem. Soc.*, 2005, **127**, 12462–12463; c) B. G. Das, R. Nallagonda, D. Dey and P. Ghorai, *Chem. Eur. J.*, 2015, **21**, 12601–12605; d) A. Skarżyńska and M. Siczek, *Polyhedron*, 2008, **27**, 1930–1936; e) B. Machura, M. Wolff, I. Gryca and R. Kruszynski, *Polyhedron*, 2012, **40**, 93–104;
7. a) B. Machura, A. Jankowska, R. Kruszynski, J. Kłak and J. Mroziński, *Polyhedron*, 2006, **25**, 2663–2672; b) S. R. Lane, N. Sisay, B. Carney, S. Danno, S. Williams, H. P. Engelbrecht, C. L. Barnes and S. S. Jurisson, *Dalton Trans.*, 2011, **40**, 269–276; c) D. A. Rotsch, K. M. Reinig, E. M. Weis, A. B. Taylor, C. L. Barnes and S. S. Jurisson, *Dalton Trans.*, 2013, **42**, 11614; d) J. Liu, J. K. Choe, Y. Wang, J. R. Shapley, C. J. Werth and T. J. Strathmann, *ACS Catal.*, 2015, **5**, 511–522; e) B. K. Dirghangi, M. Menon, A. Pramanik and A. Chakravorty, *Inorg. Chem.*, 1997, **36**, 1095–1101; f) S. Das and A. Chakravorty, *Eur. J. Inorg. Chem.*, 2006, 2285–2291;
8. a) J. Y. Kim, Y. J. Ji, H.-J. Ha and H. K. Chae, *Bull. Korean Chem. Soc.*, 2003, **24**, 504–506; b) U. Abram, R. Carballo, S. Cabaleiro, S. Garcia-Fontán and E. M. Vázquez-López, *Polyhedron*, 1999, **18**, 1495–1499;
9. J. A. Schachner, B. Terfassa, L. M. Peschel, N. Zwettler, F. Belaj, P. Cias, G. Gescheidt and N. C. Mösch-Zanetti, *Inorg. Chem.*, 2014, **53**, 12918–12928.

10. J. A. Schachner, F. Wiedemaier, N. Zwettler, L. M. Peschel, A. D. Boese, F. Belaj and N. C. Mösch-Zanetti, *J. Catal.*, 2021, **397**, 108-115.
11. G. M. Sheldrick, *Acta Crystallogr., Sect. A: Found. Crystallogr.*, 2008, 112–122.
12. G. M. Sheldrick, *Acta Crystallogr., Sect. C: Cryst. Struct. Chem.*, 2015, 3–8.
13. C. K. Johnson, *ORTEP: A FORTRAN Thermal-Ellipsoid Plot Program for Crystal Structure Illustrations: ONRL Report #3794*, Oak Ridge National Laboratory, 1965.
